# Supplementary material for: H-Bonded anion–anion complex trapped in a squaramido-based receptor
Source: Royal Society of Chemistry journal article supplement (doi:10.1039/c7cc09241e), 2017-12-12
Supplement: c7cc09241e1.pdf [file c7cc09241e1.pdf]

Electronic Supporting Information for

# H-bonded anion-anion complex trapped in a squaramido-based receptor

*Rafel Prohens,<sup>\*,a</sup> Anna Portell,<sup>a</sup> Mercè Font-Bardia,<sup>b</sup> Antonio Bauzá,<sup>c</sup> and Antonio Frontera<sup>\*,c</sup>*

<sup>a</sup>Unitat de Polimorfisme i Calorimetria, Centres Científics i Tecnològics, Universitat de Barcelona, Baldiri Reixac 10, 08028 Barcelona, Spain. E-mail: rafel@ccit.ub.edu.

<sup>b</sup>Unitat de Difracció de Raigs X, Centres Científics i Tecnològics, Universitat de Barcelona.

<sup>c</sup>Departament de Química, Universitat de les Illes Balears, Crta. de Valldemossa km 7.5, 07122 Palma (Balears), Spain. E-mail: toni.frontera@uib.es.

## **Table of contents:**

1. Table S1
2. Experimental details
3. Theoretical methods

## 1. Table S1

Table 1. Crystal data and structure refinement for **1**.

|                                   |                                                                |
|-----------------------------------|----------------------------------------------------------------|
| Identification code               | 1                                                              |
| Empirical formula                 | C <sub>33</sub> H <sub>62</sub> N <sub>8</sub> O <sub>16</sub> |
| Formula weight                    | 826.90                                                         |
| Temperature                       | 293(2) K                                                       |
| Wavelength                        | 0.71073 Å                                                      |
| Crystal system                    | Triclinic                                                      |
| Space group                       | P -1                                                           |
| Unit cell dimensions              |                                                                |
| a (Å)                             | 6.196(8)                                                       |
| b (Å)                             | 13.132(11)                                                     |
| c (Å)                             | 13.815(13)                                                     |
| α (°)                             | 73.83(5)                                                       |
| β (°)                             | 83.92(6)                                                       |
| γ (°)                             | 78.69(6)                                                       |
| Volume                            | 1057.1(19) Å <sup>3</sup>                                      |
| Z                                 | 1                                                              |
| Density (calculated)              | 1.299 Mg/m <sup>3</sup>                                        |
| Absorption coefficient            | 0.104 mm <sup>-1</sup>                                         |
| F(000)                            | 444                                                            |
| Crystal size                      | 0.2 x 0.1 x 0.1 mm <sup>3</sup>                                |
| Theta range for data collection   | 1.929 to 32.521°                                               |
| Index ranges                      | -9<=h<=9, -18<=k<=19, 0<=l<=20                                 |
| Reflections collected             | 6197                                                           |
| Independent reflections           | 6189 [R(int) = 0.0411]                                         |
| Completeness to theta = 25.003°   | 92.9 %                                                         |
| Refinement method                 | Full-matrix least-squares on F <sup>2</sup>                    |
| Data / restraints / parameters    | 6189 / 16 / 279                                                |
| Goodness-of-fit on F <sup>2</sup> | 0.885                                                          |
| Final R indices [I>2sigma(I)]     | R1 = 0.0826, wR2 = 0.2102                                      |
| R indices (all data)              | R1 = 0.1770, wR2 = 0.2466                                      |
| Largest diff. peak and hole       | 0.574 and -0.457 e.Å <sup>-3</sup>                             |

## 2. Experimental details

### Synthesis of 3,4-Bis(2-dimethylamino-ethylamino)-cyclobut-3-ene-1,2-dione

2-N,N-ethylenediamine (3.09 mL, 28.29 mmol) was added to a solution of diethylsquarate (1.60 g, 9.43 mmol) in absolute ethanol (66 mL) at r.t. under vigorous stirring and argon atmosphere. After 24 hours, the resulting white solid was filtered and washed with cold absolute ethanol (2 x 10 mL). The solid was dried under vacuum to yield 84% (2.01 g).

<sup>1</sup>H-NMR (DMSO-d<sub>6</sub>, 400 MHz) δ: 7.45 (s, 2H); 3.59 (m, J = 4 Hz, 4H); 2.37 (t, J = 4 Hz, 4H); 2.15 (s, 6H) ppm. <sup>13</sup>C-NMR (DMSO-d<sub>6</sub>, 100 MHz) δ: 184.2, 169.7, 58.5, 43.1, 38.4 ppm. MS (ESI) m/z (%): 255.3 (M+H<sup>+</sup>, 100).

### Preparation of crystals of **1**

A solution of 3,4-Bis(2-dimethylamino-ethylamino)-cyclobut-3-ene-1,2-dione (50.2 mg, 0.20 mmol) and fumaric acid (22.8 mg, 0.20 mmol) in ethanol (6 mL) was prepared. Since the solid did not completely dissolve, DMSO (8 mL) and water (1 mL) were added at 40 °C until a total dissolution. An aliquot was placed at r.t. in a thin vial and it was sealed with a septum and a needle, through which methanol was allowed to diffuse into the solution. After one month thin needles of **1** crystallized.

### **X-ray data collection details**

A colorless prism-like specimen of  $C_{33}H_{62}N_8O_{16}$ , approximate dimensions 0.100 mm x 0.100 mm x 0.200 mm, was used for the X-ray crystallographic analysis. The X-ray intensity data were measured on a MAR345 system equipped with a graphite monochromator and a Mo fine-focus sealed tube ( $\lambda = 0.71073 \text{ \AA}$ ).

The frames were integrated with the MARSCALE (Claudio Klein, 2007) using a narrow-frame algorithm. The integration of the data using a triclinic unit cell yielded a total of 6197 reflections to a maximum  $\theta$  angle of  $32.52^\circ$  ( $0.66 \text{ \AA}$  resolution), of which 6189 were independent (average redundancy 1.001, completeness = 80.7%,  $R_{\text{sig}} = 20.91\%$ ) and 2144 (34.64%) were greater than  $2\sigma(F^2)$ . The final cell constants of  $a = 6.196(8) \text{ \AA}$ ,  $b = 13.132(11) \text{ \AA}$ ,  $c = 13.815(13) \text{ \AA}$ ,  $\alpha = 73.83(5)^\circ$ ,  $\beta = 83.92(6)^\circ$ ,  $\gamma = 78.69(6)^\circ$ , volume =  $1057.1(19) \text{ \AA}^3$ , are based upon the refinement of the XYZ-centroids of reflections above  $20 \sigma(I)$ .

The structure was solved and refined using the 'SHELXL-97 (Sheldrick, 1997), using the space group  $P -1$ , with  $Z = 1$  for the formula unit,  $C_{33}H_{62}N_8O_{16}$ . The final anisotropic full-matrix least-squares refinement on  $F^2$  with 279 variables converged at  $R1 = 8.26\%$ , for the observed data and  $wR2 = 24.66\%$  for all data. The goodness-of-fit was 0.885. The largest peak in the final difference electron density synthesis was  $0.574 \text{ e}/\text{\AA}^3$  and the largest hole was  $-0.457 \text{ e}/\text{\AA}^3$  with an RMS deviation of  $0.060 \text{ e}/\text{\AA}^3$ . On the basis of the final model, the calculated density was  $1.299 \text{ g/cm}^3$  and  $F(000)$ , 444  $e^-$ .

### **3. Theoretical methods**

The energies of the anion...anion complexes included in this study were computed using the RI-MP2/aug-cc-pVTZ level of theory by means of the program

TURBOMOLE version 7.0.<sup>1</sup> The minimum nature of the complexes have been verified by performing frequency calculations. To evaluate the interactions in the solid state, we have used the crystallographic coordinates at the RI-MP2/def2-TZVP level of theory. The Bader's "Atoms in molecules" theory has been used to study the interactions discussed herein by means of the AIMall calculation package.<sup>2</sup>

---

<sup>1</sup> R. Ahlrichs, M. Bär, M. Hacer, H. Horn and C. Kömel, *Chem. Phys. Lett.*, 1989, **162**, 165.

<sup>2</sup> AIMAll (Version 13.05.06), Todd A. Keith, TK Gristmill Software, Overland Park KS, USA, 2013.
